# Supplementary material for: Deprivation and Exposure to Public Activities during the COVID-19 Pandemic in England and Wales
Source: bioRxiv or medRxiv preprint supplement (doi:10.1101/2021.04.26.21255732), 2021-04-28

## Supplementary Material

**Supplementary Table 1.**

**Proportion of participants reporting each activity and total number of respondents by deprivation quintile (24 Nov 20 – 01 Dec 20)**

| IMD Quintile              | Car Sharing or Taxi |         | Public Transport |         | Work or Education |         | Social/ Entertainment |         | Essential Shops |         | Non-Essential Shops/Services |         | Healthcare Setting |         | Non-Household Contacts |         |
|---------------------------|---------------------|---------|------------------|---------|-------------------|---------|-----------------------|---------|-----------------|---------|------------------------------|---------|--------------------|---------|------------------------|---------|
|                           | Yes % (n)           | total n | Yes % (n)        | total n | Yes % (n)         | total n | Yes % (n)             | total n | Yes % (n)       | total n | Yes % (n)                    | total n | Yes % (n)          | total n | Yes % (n)              | total n |
| <b>1 (Most Deprived)</b>  | 19.52 (344)         | 1762    | 16.52 (291)      | 1762    | 38.57 (680)       | 1763    | 4.20 (74)             | 1762    | 72.04 (1270)    | 1763    | 17.58 (310)                  | 1763    | 24.52 (432)        | 1762    | 65.06 (1145)           | 1760    |
| <b>2</b>                  | 15.63 (498)         | 3188    | 14.20 (450)      | 3186    | 36.59 (1166)      | 3187    | 4.84 (154)            | 3184    | 74.91 (2389)    | 3189    | 17.86 (569)                  | 3185    | 23.05 (734)        | 3184    | 62.77 (2003)           | 3191    |
| <b>3</b>                  | 14.34 (612)         | 4269    | 9.49 (405)       | 4267    | 33.52 (1431)      | 4269    | 3.89 (166)            | 4267    | 72.52 (3096)    | 4269    | 17.71 (756)                  | 4268    | 23.63 (1008)       | 4266    | 60.97 (2599)           | 4263    |
| <b>4</b>                  | 14.30 (784)         | 5482    | 7.89 (432)       | 5478    | 32.88 (1801)      | 5478    | 4.56 (250)            | 5477    | 73.64 (4034)    | 5478    | 18.39 (1007)                 | 5476    | 23.52 (1289)       | 5480    | 61.88 (3391)           | 5480    |
| <b>5 (Least Deprived)</b> | 11.54 (723)         | 6267    | 6.27 (393)       | 6266    | 31.16 (1952)      | 6268    | 4.12 (258)            | 6268    | 71.68 (4493)    | 6268    | 18.69 (1171)                 | 6266    | 23.92 (1499)       | 6268    | 59.85 (3748)           | 6262    |
| <b>Total</b>              | 14.12 (2961)        | 20968   | 9.40 (1971)      | 20959   | 33.54 (7031)      | 20965   | 4.30 (902)            | 20958   | 72.89 (15282)   | 20967   | 18.19 (3813)                 | 20958   | 23.67 (4962)       | 20960   | 61.49 (12886)          | 20956   |

**Note:** IMD = Indices of Multiple Deprivation; total respondents for each question reported separately due to varying frequencies across questions

**Supplementary Table 2.**

**Proportion of participants reporting each activity and total number of respondents by deprivation quintile (23 Dec 20 – 27 Dec 20)**

| IMD Quintile              | total <i>n</i> | Car Sharing<br>or Taxi | Public<br>Transport | Work or<br>Education | Social/Enterta<br>inment | Essential<br>Shops | Non-Essential<br>Shops and<br>Services | Healthcare<br>Setting | Non-<br>Household<br>Contacts |
|---------------------------|----------------|------------------------|---------------------|----------------------|--------------------------|--------------------|----------------------------------------|-----------------------|-------------------------------|
|                           |                | Yes % ( <i>n</i> )     | Yes % ( <i>n</i> )  | Yes % ( <i>n</i> )   | Yes % ( <i>n</i> )       | Yes % ( <i>n</i> ) | Yes % ( <i>n</i> )                     | Yes % ( <i>n</i> )    | Yes % ( <i>n</i> )            |
| <b>1 (Most Deprived)</b>  | 1630           | 16.20 (264)            | 12.33 (201)         | 22.39 (365)          | 2.33 (38)                | 67.85 (1106)       | 11.66 (190)                            | 16.26 (265)           | 40.92 (667)                   |
| <b>2</b>                  | 2958           | 12.07 (357)            | 8.92 (264)          | 21.20 (627)          | 1.52 (45)                | 67.04 (1983)       | 10.18 (301)                            | 14.91 (441)           | 37.19 (1100)                  |
| <b>3</b>                  | 4090           | 10.76 (440)            | 5.79 (237)          | 18.90 (773)          | 2.30 (94)                | 63.28 (2588)       | 10.73 (439)                            | 14.91 (610)           | 34.38 (1406)                  |
| <b>4</b>                  | 5262           | 10.49 (552)            | 5.02 (264)          | 18.26 (961)          | 1.94 (102)               | 64.61 (3400)       | 10.70 (563)                            | 15.18 (799)           | 33.69 (1773)                  |
| <b>5 (Least Deprived)</b> | 6180           | 8.72 (539)             | 2.83 (175)          | 16.49 (1019)         | 1.68 (104)               | 63.40 (3918)       | 11.02 (681)                            | 14.63 (904)           | 33.03 (2041)                  |
| <b>Total</b>              | 20120          | 10.70 (2152)           | 5.67 (1141)         | 18.61 (3745)         | 1.90 (383)               | 64.59 (12995)      | 10.81 (2174)                           | 15.00 (3019)          | 34.73 (6987)                  |

**Note:** IMD = Indices of Multiple Deprivation

**Supplementary Table 3.**

**Proportion of participants reporting each activity and total number of respondents by deprivation quintile (09 Feb 21 – 16 Feb 21)**

| IMD Quintile              | total <i>n</i> | Car Sharing        | Taxi               | Public Transport   | Work or Education  | Social/Entertainment | Essential Shops    | Non-Essential Shops and Services | Healthcare Setting | Non-Household Contacts |
|---------------------------|----------------|--------------------|--------------------|--------------------|--------------------|----------------------|--------------------|----------------------------------|--------------------|------------------------|
|                           |                | Yes % ( <i>n</i> ) | Yes % ( <i>n</i> ) | Yes % ( <i>n</i> ) | Yes % ( <i>n</i> ) | Yes % ( <i>n</i> )   | Yes % ( <i>n</i> ) | Yes % ( <i>n</i> )               | Yes % ( <i>n</i> ) | Yes % ( <i>n</i> )     |
| <b>1 (Most Deprived)</b>  | 2011           | 9.70 (195)         | 5.72 (115)         | 11.93 (240)        | 25.21 (507)        | 0.99 (20)            | 66.53 (1338)       | 6.46 (130)                       | 22.18 (446)        | 40.13 (807)            |
| <b>2</b>                  | 3780           | 9.44 (357)         | 3.33 (126)         | 10.16 (384)        | 23.60 (892)        | 0.48 (18)            | 63.97 (2418)       | 5.95 (225)                       | 21.61 (817)        | 37.83 (1430)           |
| <b>3</b>                  | 5174           | 8.95 (463)         | 2.03 (105)         | 5.68 (294)         | 20.00 (1035)       | 0.43 (22)            | 61.77 (3196)       | 5.51 (285)                       | 24.08 (1246)       | 35.52 (1838)           |
| <b>4</b>                  | 6629           | 8.33 (552)         | 1.48 (98)          | 4.22 (280)         | 19.79 (1312)       | 0.69 (46)            | 62.50 (4143)       | 6.59 (437)                       | 23.50 (1558)       | 33.50 (2221)           |
| <b>5 (Least Deprived)</b> | 7634           | 8.45 (645)         | 0.83 (63)          | 2.67 (204)         | 18.77 (1433)       | 0.45 (34)            | 60.61 (4627)       | 5.86 (447)                       | 23.08 (1762)       | 34.35 (2622)           |
| <b>Total</b>              | 25228          | 8.77 (2212)        | 2.01 (507)         | 5.56 (1402)        | 20.53 (5179)       | 0.55 (140)           | 62.32 (15722)      | 6.04 (1524)                      | 23.11 (5829)       | 35.35 (8918)           |

**Note:** IMD = Indices of Multiple Deprivation

**Supplementary Table 4.**

**Risk Ratios for Work and Education by IMD Quintile for Children (<16 years) versus Adults (≥16 years)**

| IMD Quintile | 24 Nov 20 – 01 Dec 20 |                                    | 23 Dec 20 – 27 Dec 20 |                                    | 09 Feb 21 – 16 Feb 21 |                                    |
|--------------|-----------------------|------------------------------------|-----------------------|------------------------------------|-----------------------|------------------------------------|
|              | Child                 | Adult                              | Child                 | Adult                              | Child                 | Adult                              |
| 1            | 0.96<br>[0.89,1.04]   | <b>1.30*</b><br><b>[1.18,1.43]</b> | 0.53<br>[0.31,0.91]   | <b>1.41*</b><br><b>[1.25,1.59]</b> | 0.90<br>[0.62,1.30]   | <b>1.39*</b><br><b>[1.26,1.55]</b> |
| 2            | 0.94<br>[0.87,1.01]   | <b>1.28*</b><br><b>[1.18,1.39]</b> | 0.90<br>[0.59,1.36]   | <b>1.31*</b><br><b>[1.18,1.45]</b> | 0.71<br>[0.50,1.00]   | <b>1.33*</b><br><b>[1.22,1.45]</b> |
| 3            | 0.98<br>[0.92,1.04]   | 1.13<br>[1.04,1.22]                | 0.67<br>[0.44,1.01]   | <b>1.21*</b><br><b>[1.09,1.34]</b> | 0.66<br>[0.48,0.92]   | 1.13<br>[1.04,1.23]                |
| 4            | 1.03<br>[0.98,1.08]   | 1.09<br>[1.01,1.17]                | 0.87<br>[0.61,1.25]   | 1.12<br>[1.02,1.23]                | 0.86<br>[0.66,1.14]   | 1.08<br>[1.00,1.17]                |
| 5            | REF                   | REF                                | REF                   | REF                                | REF                   | REF                                |

**Note:** IMD = Indices of Multiple Deprivation (1 = most deprived; 5 = least deprived); 95% confidence intervals in parentheses

\* **Bonferroni-Hochberg adjusted  $p < 0.05$**

**Supplementary Table 5.**

**Risk Ratios for Non-Household Contacts by IMD Quintile for Children versus Adults**

| IMD Quintile | 24 Nov 20 – 01 Dec 20              |                                    | 23 Dec 20 – 27 Dec 20 |                                    | 09 Feb 21 – 16 Feb 21 |                                    |
|--------------|------------------------------------|------------------------------------|-----------------------|------------------------------------|-----------------------|------------------------------------|
|              | Child                              | Adult                              | Child                 | Adult                              | Child                 | Adult                              |
| 1            | 0.92<br>[0.85,1.01]                | <b>1.11*</b><br><b>[1.06,1.18]</b> | 0.76<br>[0.54,1.08]   | <b>1.27*</b><br><b>[1.17,1.38]</b> | 0.93<br>[0.72,1.21]   | <b>1.20*</b><br><b>[1.11,1.29]</b> |
| 2            | 0.92<br>[0.85,1.00]                | <b>1.07*</b><br><b>[1.02,1.12]</b> | 0.97<br>[0.74,1.27]   | <b>1.14*</b><br><b>[1.06,1.23]</b> | 0.91<br>[0.72,1.16]   | <b>1.12*</b><br><b>[1.05,1.20]</b> |
| 3            | <b>0.91*</b><br><b>[0.84,0.97]</b> | 1.03<br>[0.99,1.08]                | 0.70<br>[0.53,0.93]   | 1.08<br>[1.01,1.16]                | 0.73<br>[0.57,0.93]   | 1.06<br>[1.00,1.13]                |
| 4            | 0.99<br>[0.93,1.04]                | 1.04<br>[1.00,1.09]                | 0.75<br>[0.58,1.96]   | 1.04<br>[0.98,1.11]                | 0.96<br>[0.79,1.17]   | 0.98<br>[0.93,1.04]                |
| 5            | REF                                | REF                                | REF                   | REF                                | REF                   | REF                                |

**Note:** IMD = Indices of Multiple Deprivation (1 = most deprived; 5 = least deprived); 95% confidence intervals in parentheses

\* **Bonferroni-Hochberg adjusted  $p < 0.05$**

**Supplementary Table 6.**

**Risk Ratios for Exposure to Work and Education Settings and Non-Household Contacts by IMD Quintile for Adults - Controlling for Presence of Child(ren) in the Household**

| IMD Quintile | 24 Nov 20 – 01 Dec 20 |                        | 23 Dec 20 – 27 Dec 20 |                        | 09 Feb 21 – 16 Feb 21 |                        |
|--------------|-----------------------|------------------------|-----------------------|------------------------|-----------------------|------------------------|
|              | Work or Education     | Non-Household Contacts | Work or Education     | Non-Household Contacts | Work or Education     | Non-Household Contacts |
| 1            | 1.28 [1.17, 1.41]*    | 1.11 [1.05, 1.17]*     | 1.38 [1.23, 1.56]*    | 1.26 [1.16, 1.38]*     | 1.38 [1.25, 1.53]*    | 1.20 [1.11, 1.29]*     |
| 2            | 1.29 [1.19, 1.39]*    | 1.07 [1.02, 1.12]*     | 1.31 [1.18, 1.45]*    | 1.14 [1.06, 1.23]*     | 1.34 [1.23, 1.46]*    | 1.12 [1.05, 1.20]*     |
| 3            | 1.14 [1.06, 1.23]*    | 1.03 [0.99, 1.08]      | 1.22 [1.10, 1.34]*    | 1.08 [1.01, 1.16]*     | 1.14 [1.05, 1.24]*    | 1.06 [1.00, 1.13]*     |
| 4            | 1.09 [1.02, 1.17]     | 1.05 [1.00, 1.09]      | 1.13 [1.03, 1.24]     | 1.04 [0.98, 1.11]      | 1.09 [1.01, 1.18]     | 0.98 [0.93, 1.04]      |
| 5            | REF                   | REF                    | REF                   | REF                    | REF                   | REF                    |

**Note:** IMD = Indices of Multiple Deprivation (1 = most deprived; 5 = least deprived); 95% confidence intervals in parentheses

\* *Bonferroni-Hochberg adjusted p<0.05*

**Supplementary Figure 1a. Risk Ratios for Public Activities and Non-Household Contacts by IMD Quintile (24 Nov 20 - 01 Dec 20)**

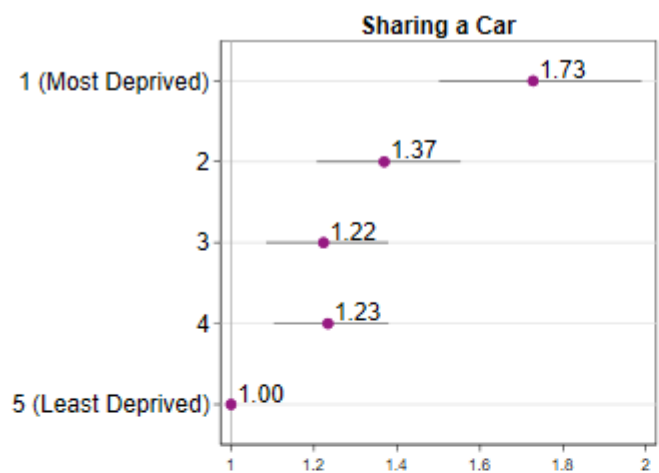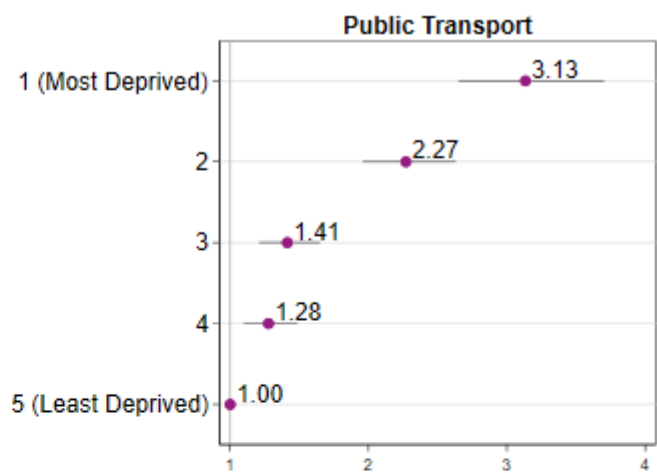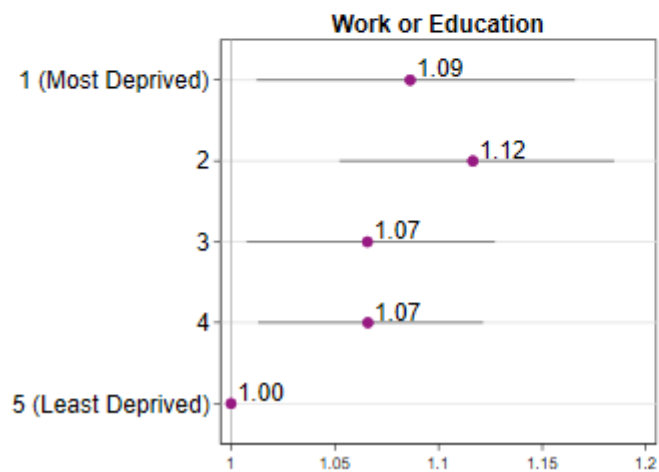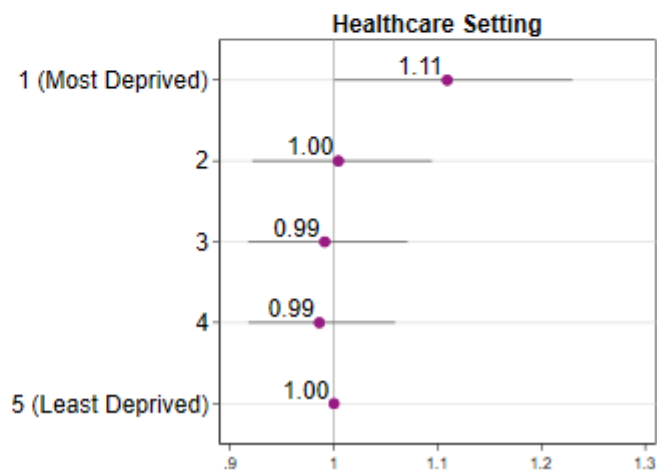

Supplementary Figure 1b. Risk Ratios for Public Activities and Non-Household Contacts by IMD Quintile (24 Nov 20 - 01 Dec 20)

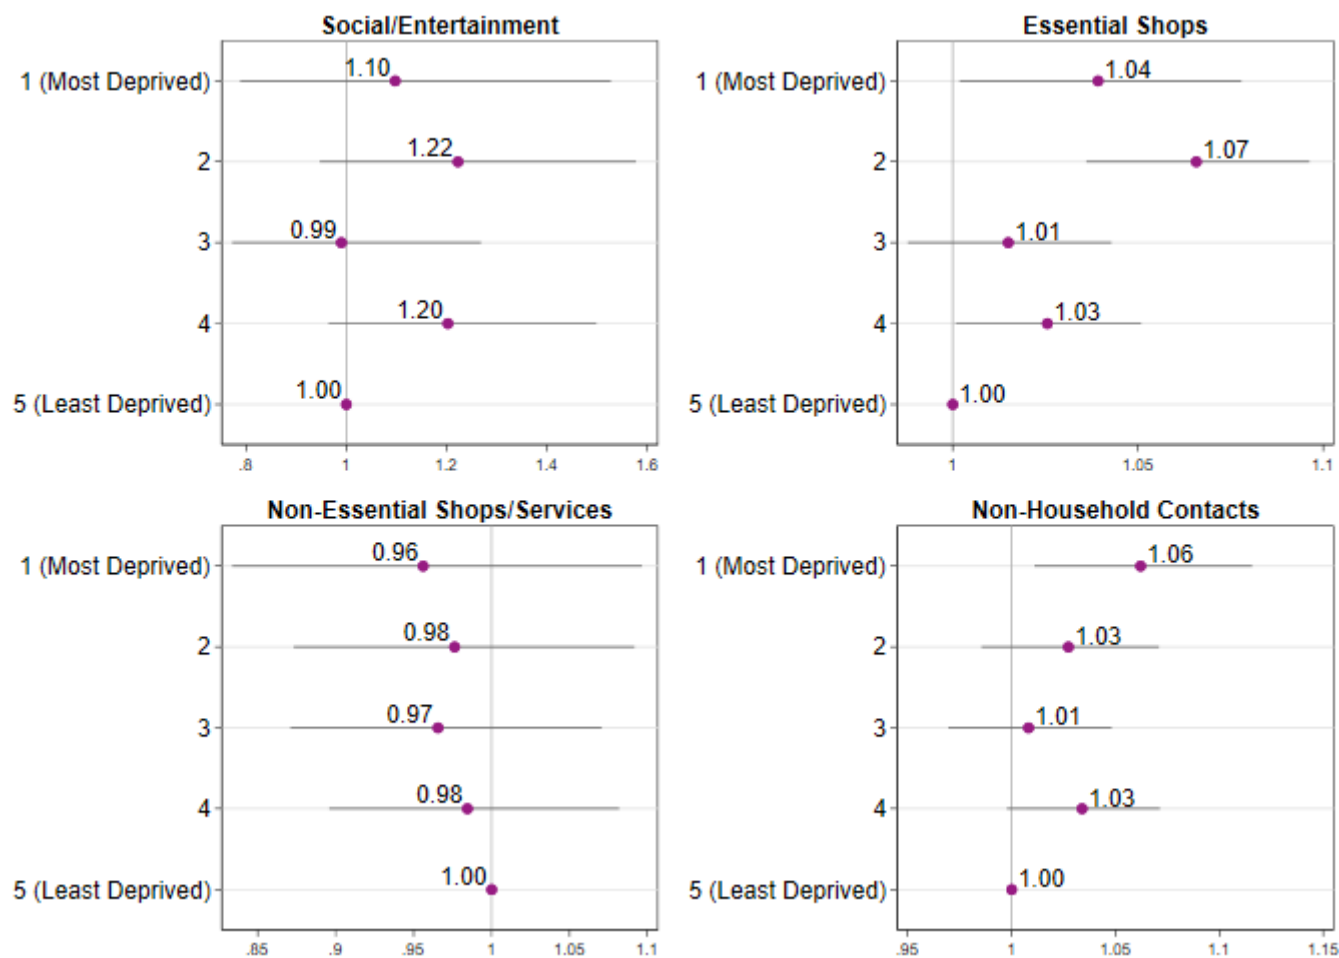



**Supplementary Figure 2a. Risk Ratios for Public Activities and Non-Household Contacts by IMD Quintile (23 Dec 20 - 27 Dec 20)**

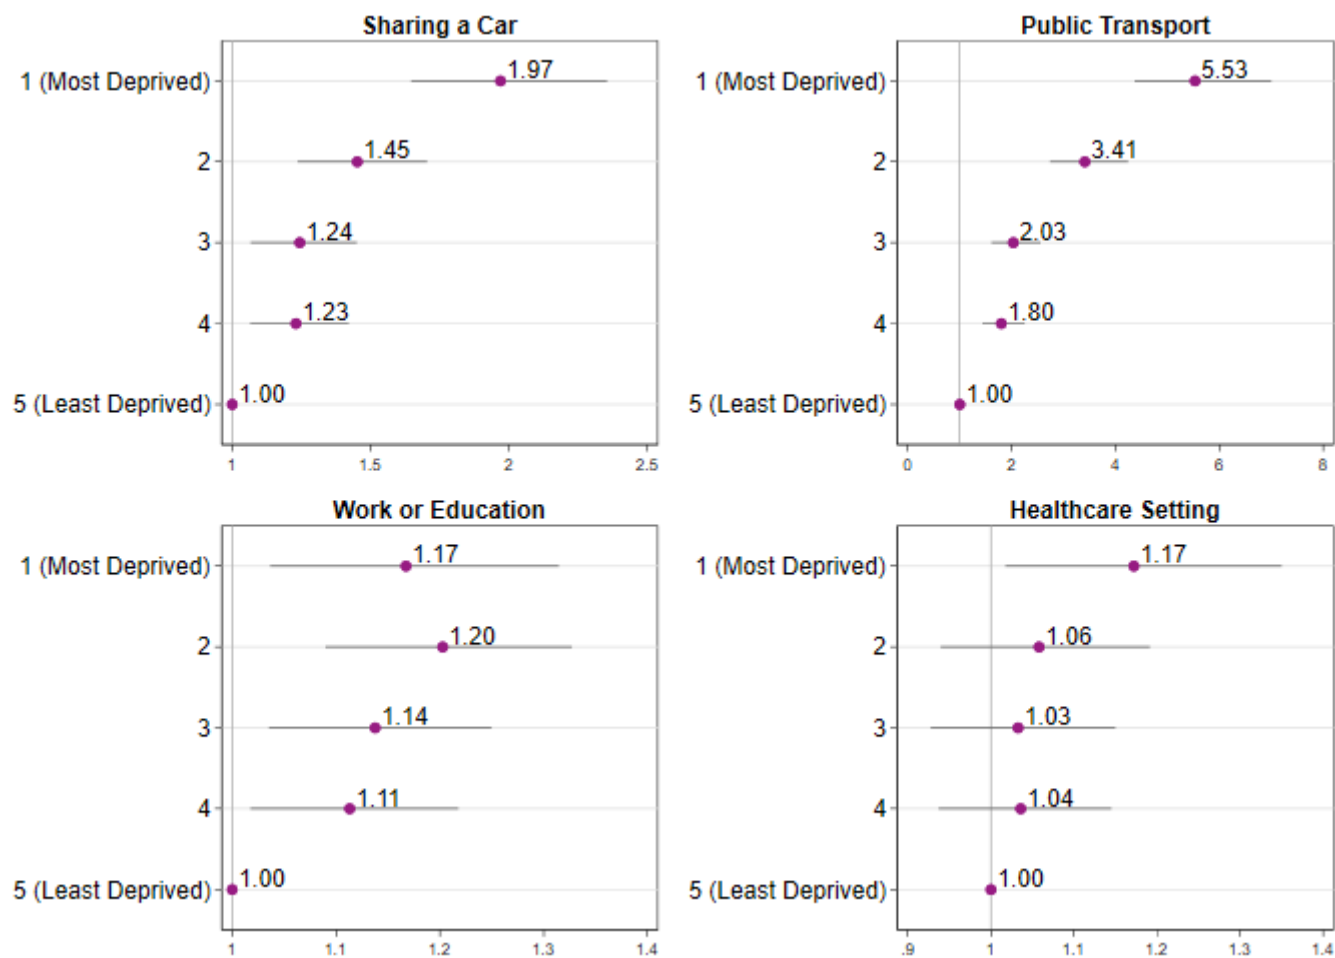

**Supplementary Figure 2b. Risk Ratios for Public Activities and Non-Household Contacts by IMD Quintile (23 Dec 20 - 27 Dec 20)**

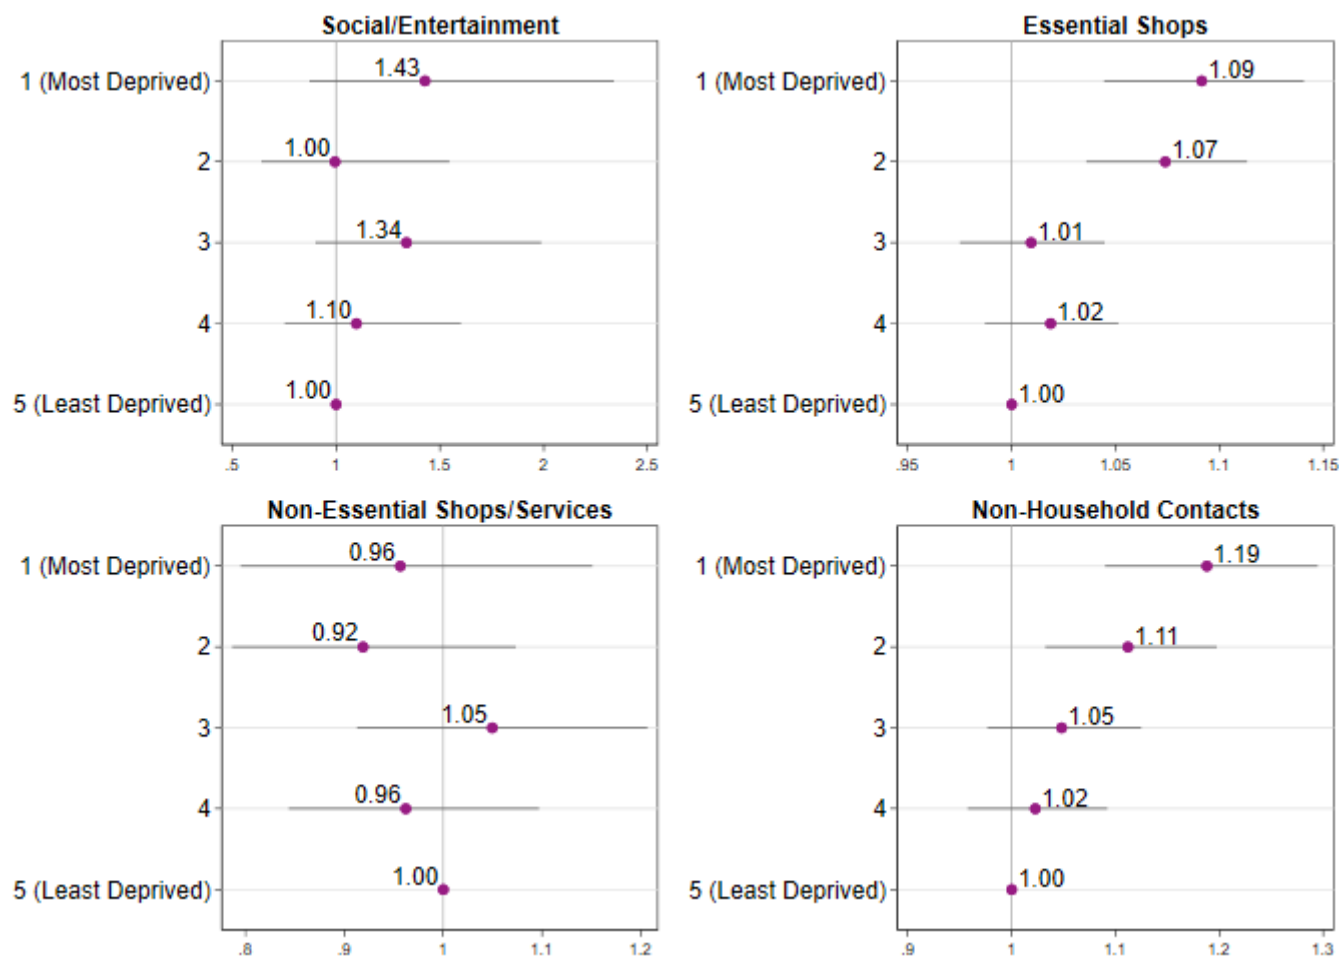

**Supplementary Figure 3a. Risk Ratios for Public Activities and Non-Household Contacts by IMD Quintile (09 Feb 21 - 16 Feb 21)**

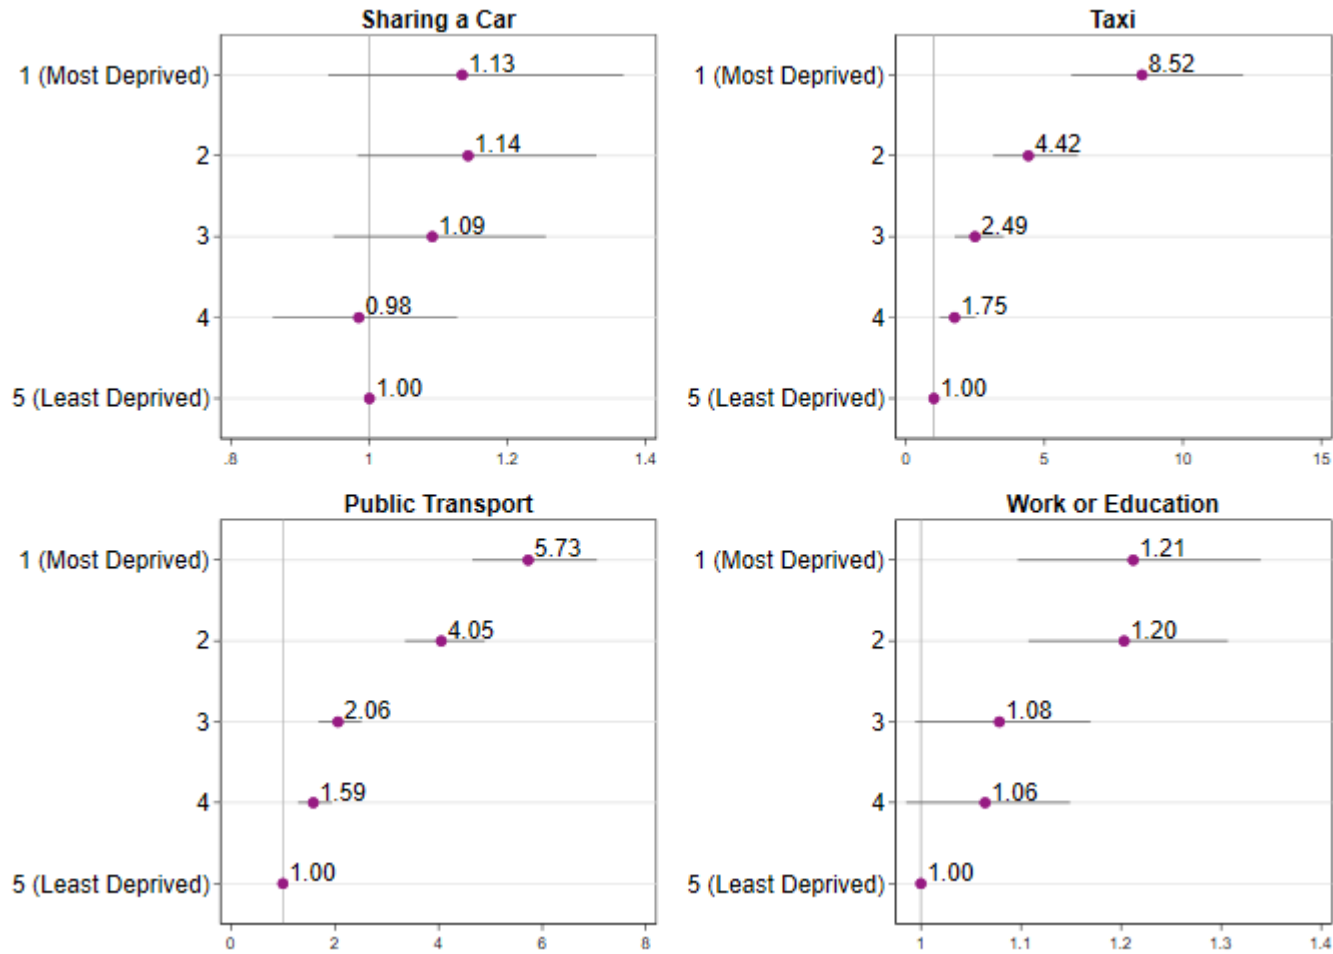

**Supplementary Figure 3b. Risk Ratios for Public Activities and Non-Household Contacts by IMD Quintile (09 Feb 21 - 16 Feb 21)**

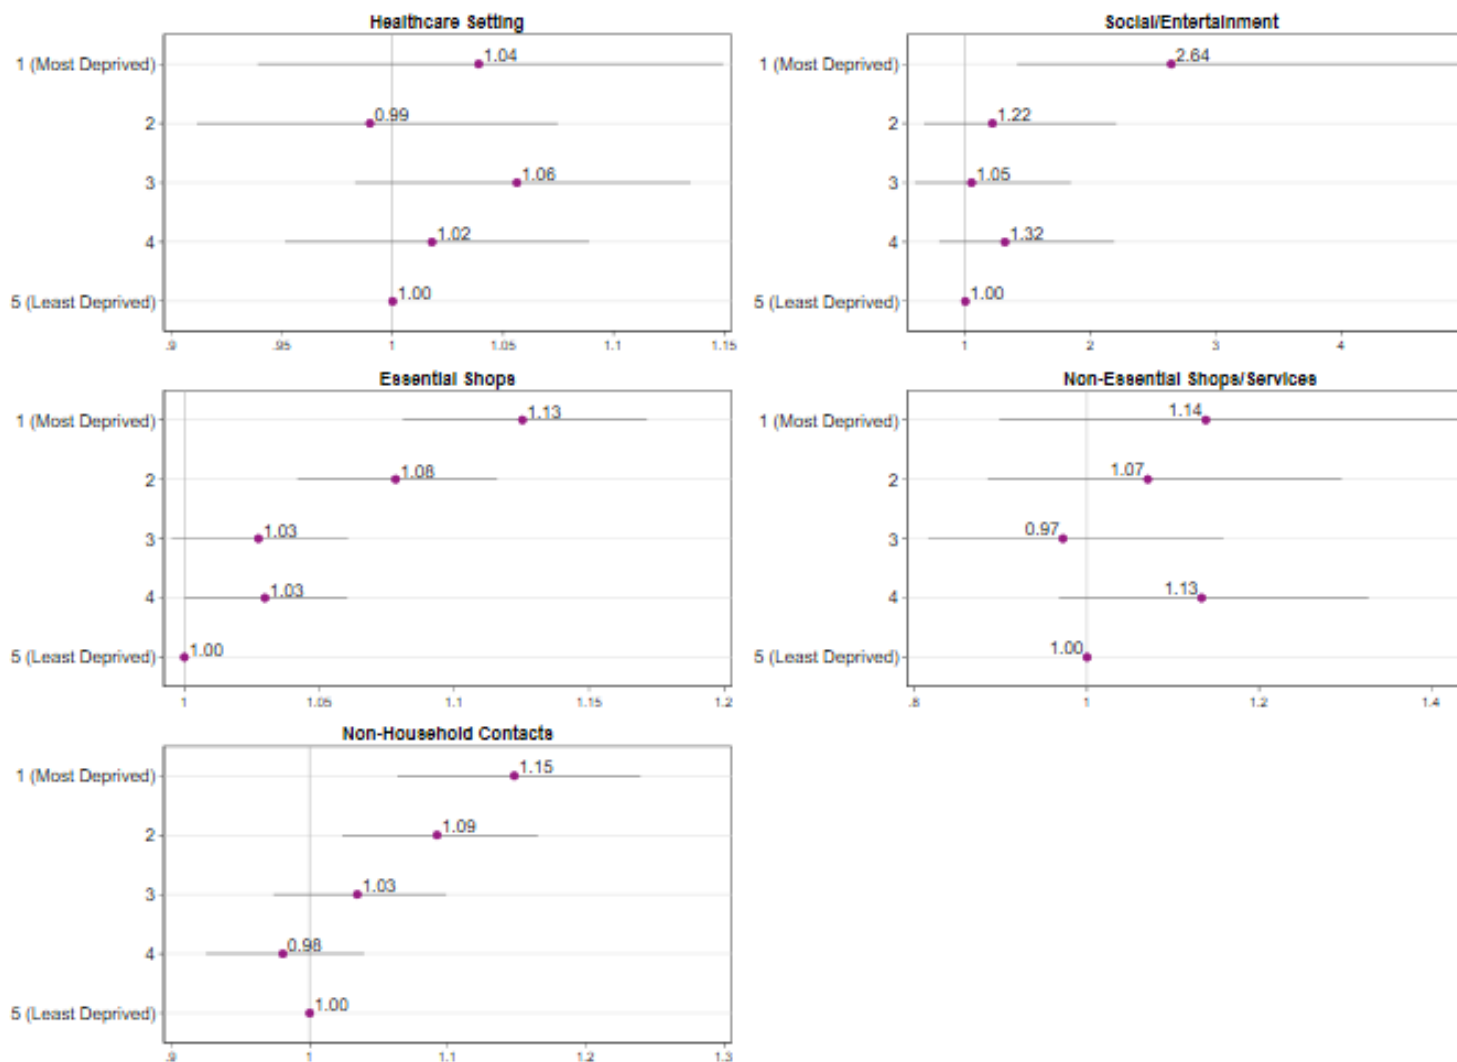

Supplement: Supplementary file [file media-1.pdf]
